## Protein phosphatase 2A regulates self-renewal of *Drosophila* neural stem cells

Cheng Wang, Kai Chen Chang, Gregory Somers, David Virshup, Beng Ti Ang, Carol Tang, Fengwei Yu and Hongyan Wang

There was an error published in *Development* 136, 2287-2296.

An incorrect version of Fig. 4, in which the same panel appears twice (upper panel of Fig. 4B and lower panel of Fig. 4C), was provided post-acceptance. The correct Fig. 4 appears below.

The authors apologise to readers for this mistake.

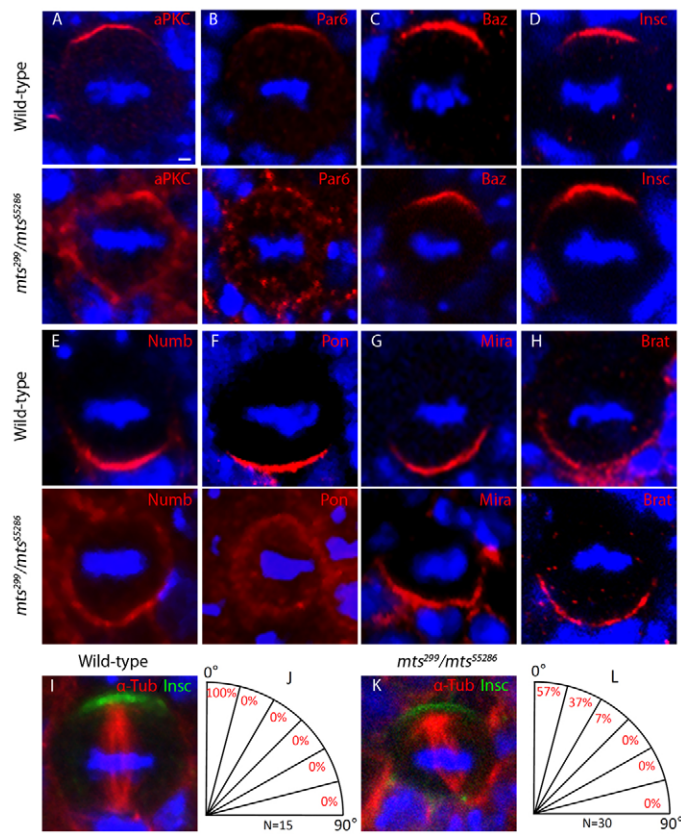

Source: https://cob.silverchair.com/dev/article-pdf/136/17/3031/1548977/3031.pdf
